# Supplementary material
Source: HighWire-hosted journal article supplement (https://diabetes.diabetesjournals.org/content/suppl/2005/05/25/54.6.1892)
Supplement: pg1892OnlineAppendix.pdf [file pg1892OnlineAppendix.pdf]

Table 1. Genotype distribution for the H324Q (C→A) SNP in *LARS2* in four different cohorts.

| Cohort                          | NGT  |              | T2DM |            | <i>P</i> | <i>P</i> <sub>adj</sub> | OR <sub>adj</sub> (95% CI) |
|---------------------------------|------|--------------|------|------------|----------|-------------------------|----------------------------|
|                                 | CC   | CA+AA        | CC   | CA+AA      |          |                         |                            |
| Hoorn Study                     | 323  | 13 (0.039)   | 193  | 18 (0.085) | 0.04     | 0.05                    | 2.19 (1.00 – 4.85)         |
| ERGO (R'dam) Study              | 432  | 25 (0.055)   | 422  | 35 (0.077) | 0.23     | 0.27                    | 1.37 (0.77 – 2.42)         |
| DK1, Steno case-control study   | 491  | 23 (0.045)   | 667  | 39 (0.055) | 0.43     | 0.11                    | 1.58 (0.90 – 2.78)         |
| DK2, Inter99 case-control study | 4248 | 253 (0.056)* | 605  | 49 (0.075) | 0.06     | 0.05                    | 1.43 (1.00 – 2.05)         |

*P*<sub>adj</sub> and OR<sub>adj</sub> values were obtained after regression analysis with adjustment for age and gender. \* including 3 AA homozygotes.
